# Supplementary material for: The Genetics of Polycystic Ovary Syndrome: An Overview of Candidate Gene Systematic Reviews and Genome-Wide Association Studies
Source: PubMed Central journal article supplement (PMC6832583; doi:10.3390/jcm8101606), 2019-10-03
Supplement: jcm-08-01606-s001.pdf [file jcm-08-01606-s001.pdf]

### Supplementary Data

**Supplemental table 1- Participant, Intervention, Comparison, outcomes and studies (PICO) framework**

|                           | <b>Participants</b>                                                                                                                                                            | <b>Interventions</b>                                                                                                                                                                                                                                                                            | <b>Comparisons</b> | <b>Outcomes</b>                                                                                                                                                                                                                                                                                       | <b>Study design</b>                                                                                                                                                                                   | <b>Limits</b>                                                                        |
|---------------------------|--------------------------------------------------------------------------------------------------------------------------------------------------------------------------------|-------------------------------------------------------------------------------------------------------------------------------------------------------------------------------------------------------------------------------------------------------------------------------------------------|--------------------|-------------------------------------------------------------------------------------------------------------------------------------------------------------------------------------------------------------------------------------------------------------------------------------------------------|-------------------------------------------------------------------------------------------------------------------------------------------------------------------------------------------------------|--------------------------------------------------------------------------------------|
| <b>Inclusion Criteria</b> | <p>-Any population where PCOS is PRIMARY FOCUS.</p> <p>-Can be interventions in PCOS, descriptions/characterisations of PCOS or comparisons of women with and without PCOS</p> | <p>Any systematic review with or without a meta-analysis</p> <p>-Review must include a search strategy containing at least key words or terms</p> <p>-Review must include the number of identified and included articles</p> <p>-Review must include some form of article quality appraisal</p> | N/A                | <p>ANY systematic review with or without meta-analysis.</p> <p>-Following article screening and data extraction the reviews will be grouped by theme: genetics, assessment, fertility treatment, Non-fertility treatment, lifestyle management, complementary or alternative medicines/therapies.</p> | Any systematic review with or without a meta-analysis                                                                                                                                                 | <p>-English Only</p> <p>-Humans</p> <p>-Published 2009 to current</p>                |
| <b>Exclusion criteria</b> | PCOS is a secondary outcome (Not main focus of the SR)                                                                                                                         |                                                                                                                                                                                                                                                                                                 | N/A                |                                                                                                                                                                                                                                                                                                       | <p>RCTs</p> <p>Cohort studies</p> <p>Case-control</p> <p>Cross sectional</p> <p>Grey literature</p> <p>Longitudinal</p> <p>Qualitative</p> <p>Case study</p> <p>Editorial</p> <p>Narrative review</p> | <p>-Not written in English</p> <p>-Animal Models</p> <p>-Published prior to 2009</p> |

**Supplemental Table 2: Search strategy in MEDLINE**

1. exp Polycystic Ovary Syndrome/
2. Polycystic Ovar\$.tw
3. pco.tw or pcos.tw
4. (sclerocystic adj3 ovar\$.tw
5. stein leventhal.tw
6. or/1-5
7. Meta-Analysis as Topic/
8. meta analy\$.tw
9. metaanaly\$.tw
10. Meta-Analysis/
11. (systematic adj (review\$1 or overview\$1)).tw.
12. exp Review Literature as Topic/
13. or/7-12
14. cochrane.ab.
15. embase.ab.
16. (psychlit or psyclit).ab.
17. (psychinfo or psycinfo).ab.
18. (cinahl or cinhal).ab.
19. science citation index.ab.
20. bids.ab.
21. cancerlit.ab.
22. or/14-21
23. reference list\$.ab.
24. bibliograph\$.ab.
25. hand-search\$.ab.
26. relevant journals.ab.
27. manual search\$.ab.
28. or/23-27
29. selection criteria.ab.
30. data extraction.ab.
31. 29 or 30
32. Review/
33. 31 and 32
34. Comment/
35. Letter/
36. Editorial/
37. animal/
38. human/
39. 37 Not (37 and 38)
40. or/34-36,39
41. 13 or 22 or 28 or 33
42. 6 and 41
43. 42 Not 40

**Supplementary table 3: Articles excluded on full text screening.**

| Author              | Title                                                                                                                                                             | Notes                                                                                                                                             |
|---------------------|-------------------------------------------------------------------------------------------------------------------------------------------------------------------|---------------------------------------------------------------------------------------------------------------------------------------------------|
| Abu Hashim 2016     | Twenty years of ovulation induction with metformin for PCOS; what is the best available evidence?                                                                 | Didn't include quality assessment                                                                                                                 |
| Al Khalifah 2015    | The effectiveness and safety of treatments used for polycystic ovarian syndrome management in adolescents: a systematic review and network meta-analysis protocol | Protocol only                                                                                                                                     |
| Amihaesei, 2016     | Polycystic Ovary Syndrome, A Complex Entity Involving Reproductive and Metabolic Impairments: A Systematic Review.                                                | Didn't include quality assessment, number of articles extracted on search, or search strategy                                                     |
| Atiomo 2009         | Proteomic biomarkers for the diagnosis and risk stratification of polycystic ovary syndrome: a systematic review                                                  | Didn't include quality assessment                                                                                                                 |
| Bacopoulou 2017     | Vitamin D predictors in polycystic ovary syndrome: a meta-analysis.                                                                                               | Didn't include quality assessment                                                                                                                 |
| Bagos 2009          | Plasminogen activator inhibitor-1 4G/5G and 5,10-methylene-tetrahydrofolate reductase C677T polymorphisms in polycystic ovary syndrome                            | Didn't include quality assessment or number of articles extracted on search                                                                       |
| Bahri 2019          | PREGNANCY COMPLICATIONS ACROSS PHENOTYPES IN POLYCYSTIC OVARY SYNDROME: A META-ANALYSIS                                                                           | Abstract only                                                                                                                                     |
| Bao 2016            | Association of DENND1A Gene Polymorphisms with Polycystic Ovary Syndrome: A Meta-Analysis                                                                         | Didn't include quality assessment                                                                                                                 |
| BaraNova 2011       | Systematic review: association of polycystic ovary syndrome with metabolic syndrome and Non-alcoholic fatty liver disease                                         | Didn't include number of articles extracted on search or quality assessment                                                                       |
| Barba 2009          | The effects of metformin on endogenous androgens and SHBG in women: a systematic review and meta-analysis                                                         | Not primarily focused on PCOS                                                                                                                     |
| Bayram 2010         | Pulsatile gonadotrophin releasing hormone for ovulation induction in subfertility associated with polycystic ovary syndrome                                       | Although Cochrane assessed content as up to date in 2010, search was conducted in 2003 so deemed this as meeting prior to 2009 exclusion criteria |
| Birch Petersen 2016 | MoNo-ovulation in women with polycystic ovary syndrome: a clinical review on ovulation induction                                                                  | Didn't include search terms or number of articles extracted on search                                                                             |
| Bouza-Alvarez       | Safety and efficacy of metformin in improving clinical, hormonal and metabolic features of polycystic ovary syndrome. Systematic review and meta-analysis         | ? HTA, bulk of article in Spanish                                                                                                                 |
| Bronstein 2011      | Age of onset of polycystic ovarian syndrome in girls may be earlier than previously thought                                                                       | Didn't include quality assessment                                                                                                                 |
| Cahill 2009         | PCOS                                                                                                                                                              | Didn't include search terms or number of articles extracted on search                                                                             |
| Cahill 2015         | Polycystic ovary syndrome (PCOS): metformin                                                                                                                       | Didn't include search terms or number of articles extracted on search                                                                             |
| Cai 2014            | Association between fat mass- and obesity-associated (FTO) gene polymorphism and polycystic ovary syndrome: a meta-analysis                                       | Didn't include quality assessment                                                                                                                 |
| Carlus 2016         | Is MTHFR 677 C>T Polymorphism Clinically Important in Polycystic Ovarian Syndrome (PCOS)? A Case-Control Study, Meta-Analysis and Trial Sequential Analysis       | Didn't include quality assessment                                                                                                                 |
| Chae 2017           | Metabolic features of adult and adolescent first-degree relatives of women with polycystic ovary syndrome: a systematic review and meta-analysis                  | Conference abstract                                                                                                                               |
| Chen 2014           | Two follicle-stimulating hormone receptor polymorphisms and polycystic ovary syndrome risk: a meta-analysis                                                       | Didn't include quality assessment                                                                                                                 |
| Chittenden 2009     | Polycystic ovary syndrome and the risk of gynaecological cancer: a systematic review                                                                              | Didn't include quality assessment                                                                                                                 |
| Conte 2015          | Mental Health and Physical Activity in Women with Polycystic Ovary Syndrome: A Brief Review                                                                       | Didn't include quality assessment                                                                                                                 |

|                       |                                                                                                                                                                                             |                                                                                           |
|-----------------------|---------------------------------------------------------------------------------------------------------------------------------------------------------------------------------------------|-------------------------------------------------------------------------------------------|
| Costello 2010         | Insulin-sensitising drugs versus the combined oral contraceptive pill for hirsutism, acne and risk of diabetes, cardiovascular disease, and endometrial cancer in polycystic ovary syndrome | No update of search strategy since 2006                                                   |
| Day 2018              | Large-scale geNOME-wide meta-analysis of polycystic ovary syndrome suggests shared genetic architecture for different diagnosis criteria                                                    | Not a systematic review                                                                   |
| de Medeiros 2017      | Risks, benefits size and clinical implications of combined oral contraceptive use in women with polycystic ovary syndrome                                                                   | Didn't include quality assessment, number of articles extracted on search                 |
| Delitala 2017         | Polycystic ovary syndrome, adipose tissue and metabolic syndrome                                                                                                                            | Narrative review                                                                          |
| Dewailly 2016         | Interactions between androgens, FSH, anti-Müllerian hormone and estradiol during folliculogenesis in the human Normal and polycystic ovary                                                  | Didn't include quality assessment, number of articles extracted on search                 |
| Dissemination         | Overweight in polycystic ovary syndrome. An update on evidence based advice on diet, exercise and metformin use for weight loss                                                             | Didn't include number of articles extracted on search or quality assessment               |
| Dissemination         | N-acetylcysteine for treating women with clomiphene citrate resistant polycystic ovary syndrome: a systematic review                                                                        | Not in English                                                                            |
| Dissemination         | Rosiglitazone versus metformin for polycystic ovary syndrome: a systematic review (Provisional abstract)                                                                                    | Not in English                                                                            |
| Dissemination 2012    | Efficacy of inositol in women with polycystic ovary syndrome and desire for children: systematic review and meta-analysis                                                                   | Not in English                                                                            |
| Dissemination 2015    | Letrozole for ovulation induction in women with polycystic ovarian syndrome: a systematic analysis                                                                                          | Not in English                                                                            |
| Dissemination 2015    | Thiazolidinediones combined with metformin in treatment of polycystic ovary syndrome: a systematic review                                                                                   | Not in English                                                                            |
| Dissemination 2016    | Laparoscopic surgery versus laparotomy for women with polycystic ovarian syndrome: a systematic review.                                                                                     | Not in English                                                                            |
| Dokas 2011            | Increased risk for abnormal depression scores in women with polycystic ovary syndrome: a systematic review and meta-analysis                                                                | Didn't include quality assessment                                                         |
| Du 2010               | Two FSHR variants, haplotypes and meta-analysis in Chinese women with premature ovarian failure and polycystic ovary syndrome                                                               | Didn't include search terms, quality assessment or number of articles extracted on search |
| Du 2013               | The relationship between thyroiditis and polycystic ovary syndrome: a meta-analysis                                                                                                         | Didn't include quality assessment                                                         |
| Eckmann 2009          | Aromatase inhibitors for ovulation and pregnancy in polycystic ovary syndrome                                                                                                               | Didn't include number of articles extracted on search or quality assessment               |
| Escobar-Morreale 2011 | Circulating inflammatory markers in polycystic ovary syndrome: a systematic review and metaanalysis                                                                                         | Didn't include quality assessment                                                         |
| Escobar-Morreale 2016 | Health-related quality of life in polycystic ovary syndrome patients: A systematic review                                                                                                   | did Not address PCOS co-morbidities                                                       |
| Eyvazzadeh 2009       | The role of the endogenous opioid system in polycystic ovary syndrome                                                                                                                       | Not a systematic review                                                                   |
| Fan 2013              | Association between the (TAAAA)n SHBG polymorphism and PCOS: a systematic review and meta-analysis                                                                                          | Didn't include quality assessment                                                         |
| Farquhar 2009         | Laparoscopic ovarian diathermy versus metformin for women with polycystic ovarian syndrome                                                                                                  |                                                                                           |
| Fazelian 2017         | Chromium supplementation and polycystic ovary syndrome: A systematic review and meta-analysis                                                                                               | Didn't include a quality assessment                                                       |
| Fazleen 2018          | Risk of metabolic syndrome in adolescents with polycystic ovarian syndrome: A systematic review and meta-analysis                                                                           | Did Not include search strategy                                                           |
| Fernandez 2011        | Ovarian drilling for surgical treatment of polycystic ovarian syndrome: a comprehensive review                                                                                              | Didn't include quality assessment                                                         |
| Filippou 2017         | Is foetal hyperexposure to androgens a cause of PCOS?                                                                                                                                       | Narrative review                                                                          |

|                |                                                                                                                                                                                   |                                                                                           |
|----------------|-----------------------------------------------------------------------------------------------------------------------------------------------------------------------------------|-------------------------------------------------------------------------------------------|
| Frary 2016     | The effect of dietary carbohydrates in women with polycystic ovary syndrome: a systematic review.                                                                                 | Didn't include quality assessment                                                         |
| Fu 2014        | Association of methylenetetrahydrofolate reductase gene C677T polymorphism with polycystic ovary syndrome risk: a systematic review and meta-analysis update                      | Didn't include quality assessment                                                         |
| Galazis 2012   | Proteomic biomarkers for ovarian cancer risk in women with polycystic ovary syndrome: a systematic review and biomarker database integration                                      | Exclude, PCOS SR component update of Atiomo 2008/9 with No quality assessment             |
| Galazis 2012   | Metabolomic biomarkers of impaired glucose tolerance and type 2 diabetes mellitus with a potential for risk stratification in women with polycystic ovary syndrome                | Not primarily focused on PCOS                                                             |
| Galazis 2013   | Proteomic biomarkers of endometrial cancer risk in women with polycystic ovary syndrome: a systematic review and biomarker database integration                                   | Exclude, PCOS SR component update of Atiomo 2008/9 with No quality assessment             |
| Galazis 2013   | Proteomic biomarkers of preterm birth risk in women with polycystic ovary syndrome (PCOS): a systematic review and biomarker database integration                                 | Exclude, PCOS SR component update of Atiomo 2008/9 with No quality assessment             |
| Gao 2012       | Association of the T45G and G276T polymorphisms in the adiponectin gene with PCOS: A meta-analysis                                                                                | Didn't include quality assessment or number of articles extracted on search               |
| Garg 2016      | Relationship between Advanced Glycation End Products and Steroidogenesis in PCOS                                                                                                  | Didn't include quality assessment, number of articles extracted on search                 |
| Groth 2010     | Adiponectin and Polycystic Ovary Syndrome                                                                                                                                         | Didn't include number of articles extracted on search or quality assessment               |
| Gu 2016        | The association between paraoxonase 1 gene polymorphisms and polycystic ovarian syndrome                                                                                          | Didn't include a quality assessment                                                       |
| Gui 2017       | ardiovascular autoNomic dysfunction in women with polycystic ovary syndrome: a systematic review and meta-analys                                                                  | Didn't include a quality assessment                                                       |
| Haoula 2012    | Evaluating the association between endometrial cancer and polycystic ovary syndrome                                                                                               | Didn't include quality assessment                                                         |
| Harris 2018    | Polycystic Ovary Syndrome, OligomeNorrhoea, and Risk of Ovarian Cancer Histotypes: Evidence from the Ovarian Cancer Association Consortium.                                       | Narrative review                                                                          |
| He 2012        | A meta-analysis on the association between PPAR-gamma Pro12Ala polymorphism and polycystic ovary syndrome                                                                         | Didn't include quality assessment                                                         |
| Huang 2012     | Four polymorphisms of the CAPN 10 gene and their relationship to polycystic ovary syndrome susceptibility: a meta-analysis                                                        | Didn't include quality assessment or number of articles extracted on search               |
| Ioannidis 2010 | Polymorphisms of the insulin receptor and the insulin receptor substrates genes in polycystic ovary syndrome: a Mendelian randomization meta-analysis                             | Didn't include quality assessment or number of articles extracted on search               |
| Jalilian 2015  | Prevalence of polycystic ovary syndrome and its associated complications in Iranian women: A meta-analysis                                                                        | Didn't include quality assessment                                                         |
| Janci 2012     | Polycystic Ovarian Syndrome: Metformin or Thiazolidinediones for Cardiovascular Risk Reduction?                                                                                   | Didn't include number of articles extracted on search or quality assessment               |
| Jia 2013       | Association of angiotensin-converting enzyme gene insertion/deletion polymorphism with polycystic ovary syndrome: a meta-analysis                                                 | Didn't include quality assessment                                                         |
| Jia 2014       | Association between retiNol-binding protein 4 and polycystic ovary syndrome: a meta-analysis                                                                                      | Didn't include quality assessment                                                         |
| Johnson 2011   | Metformin is a reasonable first-line treatment option for Non-obese women with infertility related to aNovulatory polycystic ovary syndrome--a meta-analysis of randomised trials | Didn't include search terms, number of articles extracted on search or quality assessment |
| Kelly 2011     | Insulin-like growth factor binding protein-1 in PCOS: a systematic review and meta-analysis                                                                                       | Didn't include quality assessment                                                         |
| Khan 2015      | Overlap of proteomics biomarkers between women with pre-eclampsia and PCOS: a systematic review and biomarker database integration                                                | Exclude, PCOS SR component update of Atiomo 2008/9 with No quality assessment             |

|                |                                                                                                                                                                                                     |                                                                                           |
|----------------|-----------------------------------------------------------------------------------------------------------------------------------------------------------------------------------------------------|-------------------------------------------------------------------------------------------|
| Kjerulff 2011  | Pregnancy outcomes in women with polycystic ovary syndrome: a metaanalysis                                                                                                                          | Didn't include quality assessment                                                         |
| Kong 2015      | Impact of Treatment with Metformin on Adipocytokines in Patients with Polycystic Ovary Syndrome: A Meta-Analysis                                                                                    | Didn't include quality assessment                                                         |
| Krul-Poel 2013 | The role of vitamin D in metabolic disturbances in polycystic ovary syndrome: a systematic review                                                                                                   | Didn't include quality assessment                                                         |
| Lai 2014       | Chinese Herbal Medicine for Oligomenorrhoea and Amenorrhoea in Polycystic Ovary Syndrome: A Systematic Review and Meta-Analysis                                                                     | Abstract only                                                                             |
| Lakkakula 2013 | Genetic variants associated with insulin signaling and glucose homeostasis in the pathogenesis of insulin resistance in polycystic ovary syndrome: a systematic review                              | Didn't include search terms, quality assessment or number of articles extracted on search |
| Lautatzis 2013 | Efficacy and safety of metformin during pregnancy in women with gestational diabetes mellitus or polycystic ovary syndrome: a systematic review                                                     | Didn't include search terms                                                               |
| Lee 2014       | Plasminogen activator inhibitor-1 4G/5G and the MTHFR 677C/T polymorphisms and susceptibility to polycystic ovary syndrome: a meta-analysis                                                         | Didn't include quality assessment or number of articles extracted on search               |
| Lim 2010       | Current evidence of acupuncture on polycystic ovarian syndrome.                                                                                                                                     | Didn't include search terms, number of articles extracted on search or quality assessment |
| Lin 2013       | Androgen receptor gene polymorphism and polycystic ovary syndrome                                                                                                                                   | Didn't include quality assessment                                                         |
| Lin 2014       | Is a GnRH antagonist protocol better in PCOS patients? A meta-analysis of RCTs                                                                                                                      | Didn't include quality assessment                                                         |
| Liu 2014       | Plasminogen activator inhibitor-1 -675 4G/5G polymorphism and polycystic ovary syndrome risk: a meta analysis                                                                                       | Didn't include quality assessment                                                         |
| Liu 2016       | Meta-analysis of the correlation between the TNF-alpha308G/A polymorphism and polycystic ovary syndrome                                                                                             | Didn't include quality assessment                                                         |
| Liu 2017       | Association between fat mass and obesity associated (FTO) gene rs9939609 A/T polymorphism and polycystic ovary syndrome: a systematic review and meta-analysis                                      | Didn't include a quality assessment                                                       |
| Louwers 2013   | Cross-ethnic meta-analysis of genetic variants for polycystic ovary syndrome                                                                                                                        | Didn't include quality assessment or number of articles extracted on search               |
| Mancini 2011   | Gonadotrophin-releasing hormone-antagonists vs long agonist in in-vitro fertilization patients with polycystic ovary syndrome: a meta-analysis                                                      | Didn't include quality assessment                                                         |
| Misso 2012     | Status of clomiphene citrate and metformin for infertility in PCOS                                                                                                                                  | Not a systematic review                                                                   |
| Misso 2015     | Metformin in women with PCOS, cons                                                                                                                                                                  | Not a systematic review                                                                   |
| Morris 2016    | What does a diagnostic label of 'polycystic ovary syndrome' really mean in adolescence? A review of current practice recommendations                                                                | Didn't include quality assessment                                                         |
| Naderpoor 2015 | Metformin and lifestyle modification in polycystic ovary syndrome: systematic review and meta-analysis                                                                                              | Didn't include search terms                                                               |
| Nahuis 2011    | Metformin co-administration during follicle stimulating hormone ovulation induction with timed intercourse or intra-uterine insemination for subfertility associated with polycystic ovary syndrome |                                                                                           |
| Nahuis 2013    | The basic fertility workup in women with polycystic ovary syndrome: a systematic review                                                                                                             | Didn't include quality assessment                                                         |
| Niafar 2016    | A systematic review of GLP-1 agonists on the metabolic syndrome in women with polycystic ovaries                                                                                                    | Didn't include quality assessment                                                         |
| Nicholson 2010 | Effectiveness of long-term (twelve months) Nonsurgical weight loss interventions for obese women with polycystic ovary syndrome: a systematic review                                                | Didn't include quality assessment                                                         |
| Omabe 2018     | Emerging Metabolomics Biomarkers of Polycystic Ovarian Syndrome; Targeting the Master Metabolic Disrupters for Diagnosis and Treatment                                                              | Narrative review                                                                          |
| Palomba 2015   | Pregnancy complications in women with polycystic ovary syndrome                                                                                                                                     | Didn't include number of articles extracted on search or quality assessment               |

|                  |                                                                                                                                                                                                                           |                                                                                                                |
|------------------|---------------------------------------------------------------------------------------------------------------------------------------------------------------------------------------------------------------------------|----------------------------------------------------------------------------------------------------------------|
| Parsanezhad 2009 | Surgical ovulation induction in women with polycystic ovary syndrome: a systematic review                                                                                                                                 | Didn't include number of articles extracted on search or quality assessment                                    |
| Peitsidis 2010   | Role of vascular endothelial growth factor in women with PCO and PCOS: a systematic review                                                                                                                                | Didn't include quality assessment                                                                              |
| Peng 2014        | The association between androgen receptor gene CAG polymorphism and polycystic ovary syndrome: a case-control study and meta-analysis                                                                                     | Didn't include quality assessment                                                                              |
| Qin 2013         | Obstetric complications in women with polycystic ovary syndrome: a systematic review and meta-analysis                                                                                                                    | Didn't include quality assessment                                                                              |
| Rajender 2013    | Androgen receptor CAG repeats length polymorphism and the risk of polycystic ovarian syndrome (PCOS)                                                                                                                      | Didn't include quality assessment                                                                              |
| Reis 2017        | Vitamin D receptor polymorphisms and the polycystic ovary syndrome: A systematic review                                                                                                                                   | Narrative review                                                                                               |
| Ren 2014         | [A meta-analysis on acupuncture treatment of polycystic ovary syndrome]                                                                                                                                                   | Not in English                                                                                                 |
| Rocca 2015       | Polycystic ovary syndrome: chemical pharmacotherapy                                                                                                                                                                       | Not a systematic review                                                                                        |
| Rocha 2017       | Non-alcoholic fatty liver disease in women with polycystic ovary syndrome: systematic review and meta-analysis.                                                                                                           | Didn't include a quality assessment                                                                            |
| Saha 2013        | N-acetyl cysteine in clomiphene citrate resistant polycystic ovary syndrome: A review of reported outcomes                                                                                                                | Didn't include quality assessment                                                                              |
| San-Millan 2010  | The role of genetic variation in peroxisome proliferator-activated receptors in the polycystic ovary syndrome (PCOS): an original case-control study followed by systematic review and meta-analysis of existing evidence | Didn't include quality assessment                                                                              |
| Showell 2016     | INositol for subfertile women with polycystic ovary syndrome                                                                                                                                                              |                                                                                                                |
| Sirmans 2012     | Polycystic ovary syndrome and chronic inflammation: pharmacotherapeutic implications                                                                                                                                      | Didn't include number of articles extracted on search or quality assessment                                    |
| Skowronska 2016  | The role of vitamin D in reproductive dysfunction in women - a systematic review.                                                                                                                                         | Didn't include quality assessment, number of articles extracted on search                                      |
| Song 2014        | Lack of association of INS VNTR polymorphism with polycystic ovary syndrome: a meta-analysis                                                                                                                              | Didn't include quality assessment                                                                              |
| Sun 2013         | Effect of metformin on ovulation and reproductive outcomes in women with polycystic ovary syndrome: a meta-analysis of randomized controlled trials                                                                       | Didn't include quality assessment                                                                              |
| Taghavi 2015     | Type 1 Diabetes and Polycystic Ovary Syndrome: Systematic Review and Meta-analysis                                                                                                                                        | Not primarily focused on PCOS                                                                                  |
| Tang 2009        | WITHDRAWN: Insulin-sensitising drugs for polycystic ovary syndrome                                                                                                                                                        | Withdrawn from publication as error in citation                                                                |
| Tang 2010        | Ultrasound-guided transvaginal ovarian needle drilling for clomiphene-resistant polycystic ovarian syndrome in subfertile women                                                                                           |                                                                                                                |
| Tang 2012        | Association of Pro12Ala polymorphism in peroxisome proliferator-activated receptor gamma with polycystic ovary syndrome: a meta-analysis                                                                                  | Didn't include quality assessment                                                                              |
| Tang 2015        | Insulin receptor substrate-1 (IRS-1) rs1801278G>A polymorphism is associated with polycystic ovary syndrome susceptibility: a meta-analysis                                                                               | Didn't include quality assessment                                                                              |
| Tang 2017        | Circulating omentin-1 levels in women with polycystic ovary syndrome: a meta-analysis                                                                                                                                     | Didn't include a quality assessment                                                                            |
| Thethi 2015      | Role of Insulin Sensitizers on Cardiovascular Risk Factors in Polycystic Ovarian Syndrome: A Meta-Analysis                                                                                                                | "Reviewers worked independently and in duplicate to determine the methodological quality" but No details given |
| Tomlinson 2010   | Type 2 diabetes and cardiovascular disease in polycystic ovary syndrome: what are the risks and can they be reduced?                                                                                                      | Didn't include search terms or number of articles extracted on search                                          |

|                    |                                                                                                                                                                                                                      |                                                                             |
|--------------------|----------------------------------------------------------------------------------------------------------------------------------------------------------------------------------------------------------------------|-----------------------------------------------------------------------------|
| Toulis 2011        | Meta-analysis of cardiovascular disease risk markers in women with polycystic ovary syndrome                                                                                                                         | Didn't include quality assessment                                           |
| Tsikouras 2015     | Features of Polycystic Ovary Syndrome in adolescence                                                                                                                                                                 | Didn't include number of articles extracted on search or quality assessment |
| Unfer 2012         | Effects of myo-inositol in women with PCOS: a systematic review of randomized controlled trials                                                                                                                      | Didn't include quality assessment                                           |
| Wang 2012          | [Therapeutic effect of metformin for clomiphene-resistant infertility patients with polycystic ovary syndrome: a systematic analysis]                                                                                | Not in English                                                              |
| Wang 2012          | Negative association between androgen receptor gene CAG repeat polymorphism and polycystic ovary syndrome? A systematic review and meta-analysis                                                                     | Didn't include quality assessment                                           |
| Wang 2015          | 4G/5G polymorphism of plasminogen activator inhibitor-1 gene is associated with polycystic ovary syndrome in Chinese patients: a meta-analysis                                                                       | Didn't include quality assessment or number of articles extracted on search |
| Wang 2017          | Pregnancy complications among women with polycystic ovary syndrome in China: a Meta-analysis                                                                                                                         | Not in English                                                              |
| Wang 2017          | The role of AMH and its receptor SNP in the pathogenesis of PCOS                                                                                                                                                     | Didn't include a quality assessment                                         |
| Wang 2018          | Higher circulating irisin levels in patients with polycystic ovary syndrome: a meta-analysis.                                                                                                                        | Didn't include a quality assessment                                         |
| Wild 2010          | Assessment of cardiovascular risk and prevention of cardiovascular disease in women with the polycystic ovary syndrome: a consensus statement by the Androgen Excess and Polycystic Ovary Syndrome (AE-PCOS) Society | Not a systematic review                                                     |
| Wild 2011          | Lipid levels in polycystic ovary syndrome: systematic review and meta-analysis                                                                                                                                       | Didn't include quality assessment                                           |
| Wojciechowski 2012 | Impact of FTO genotypes on BMI and weight in polycystic ovary syndrome: a systematic review and meta-analysis                                                                                                        | Didn't include quality assessment                                           |
| Wu 2016            | Acupuncture for treating polycystic ovary syndrome: guidance for future randomized controlled trials                                                                                                                 | Didn't include number of articles extracted on search                       |
| Xian 2012          | ADIPOQ gene polymorphisms and susceptibility to polycystic ovary syndrome: a HuGE survey and meta-analysis                                                                                                           | Didn't include quality assessment                                           |
| Xiao 2011          | Effectiveness of GnRH antagonist in vitro fertilization-embryo transfer (IVF-ET) in PCOS patients: a systematic review                                                                                               | Not in English                                                              |
| Xie 2013           | Microsatellite polymorphism in the fibrillin 3 gene and susceptibility to PCOS: a case-control study and meta-analysis                                                                                               | Didn't include quality assessment or number of articles extracted on search |
| Xu 2014            | Effect of metformin on serum interleukin-6 levels in polycystic ovary syndrome: a systematic review                                                                                                                  | Didn't include quality assessment                                           |
| Yu 2014            | Polymorphisms of pentanucleotide repeats (ttta) <sub>n</sub> in the promoter of CYP11A1 and their relationships to polycystic ovary syndrome (PCOS) risk: a meta-analysis                                            | Didn't include quality assessment                                           |
| Yu 2017            | Comparative effectiveness of 9 ovulation-induction therapies in patients with clomiphene citrate-resistant polycystic ovary syndrome: a network meta-analysis.                                                       | Did Not include search strategy                                             |
| Zhang 2012         | Association between the Pro12Ala polymorphism of PPAR-gamma gene and the polycystic ovary syndrome: a meta-analysis of case-control studies                                                                          | Didn't include quality assessment                                           |
| Zhang 2014         | The -675 4G/5G polymorphism in the PAI-1 gene may Not contribute to the risk of PCOS                                                                                                                                 | Didn't include quality assessment or number of articles extracted on search |
| Zhang 2015         | Peroxisome proliferator-activated receptor gamma rs1801282 C>G polymorphism is associated with polycystic ovary syndrome susceptibility: a meta-analysis involving 7,069 subjects                                    | Didn't include quality assessment                                           |
| Zhang 2018         | Effect of microecological preparation supplementation on woman with polycystic ovary syndrome: A meta-analysis protocol                                                                                              | Protocol only                                                               |

**Supplementary table 4: Characteristics of included systematic reviews assessing the genetics of PCOS.**



| Author             | Publication date | Languages included in SR | Sample size of SR (n= participants)                                                      | Types of primary studies included | SR methodology | QA methodology and authors judgement of quality (if available) of primary studies |
|--------------------|------------------|--------------------------|------------------------------------------------------------------------------------------|-----------------------------------|----------------|-----------------------------------------------------------------------------------|
| Chen et al. [1]    | 2018             | No restriction           | PCOS 512;<br>Controls 606                                                                | Case-control or cohort            | Yes- PRISMA    | NOS-6.33/9<br>(Acceptable)                                                        |
| Feng et al.[2]     | 2015             | No restriction           | PCOS 17 460;<br>Controls 23 845                                                          | Case-control or cohort            | Yes- PRISMA    | NOS- 6.75/9<br>(did Not specify if considered high or low quality)                |
| Gao et al. [3]     | 2016             | No restriction           | PCOS 15 074<br>Controls 113 997                                                          | Case-control                      | No             | NOS- 6.6/9<br>(did Not specify if considered high or low quality)                 |
| Guo et al.[4]      | 2015             | No restriction           | PCOS 1 665;<br>Controls 1 687                                                            | Case-control                      | Yes- PRISMA    | NOS- High quality                                                                 |
| Jia et al.[5]      | 2012             | English                  | T45G SNP<br>PCOS 1 104;<br>Controls 1 717<br><br>G276T<br>PCOS 823;<br>Controls 982      | Case-control                      | No             | Modified scoring system - Low quality                                             |
| Li et al.[6]       | 2012             | No restriction           | PCOS 1321;<br>Control 1017                                                               | Case-control                      | No             | QA methodology Not specified.<br>Quality of primary studies was satisfactory.     |
| Liao et al. [7]    | 2018             | No restriction           | PCOS: 2249<br>Controls: 1977                                                             | Case-control                      | No             | NOS (good to fair)                                                                |
| Liu et al. [8]     | 2018             | English or Chinese       | rs1501299 G/T<br>PCOS: 2602<br>CON: 3773<br><br>rs2241766 T/G<br>PCOS: 2358<br>CON: 4034 | Case-control                      | Yes- PRISMA    | NOS (High quality)                                                                |
| Pabalan et al. [9] | 2016             | No restrictions          | Not described                                                                            | Case-control                      | Yes- PRISMA    | Clark-Baudouin Score (High quality)                                               |
| Qiu et al.[10]     | 2015             | English and Chinese      | PCOS 2670;<br>Control 7752                                                               | Case-control                      | No             | CASP & STREGA- Medium to high quality                                             |
| Ramos et al.[11]   | 2015             | No restrictions          | PCOS 1892;<br>Control 2695                                                               | Case-control and cross-sectional  | Yes- PRISMA    | NOS- Range 5 to 7                                                                 |
| Ruan et al.[12]    | 2012             | English                  | PCOS 1877;<br>Control 2 444                                                              | Case-control and cross-sectional  | No             | QA methodology Not specified a                                                    |
| Shen et al.[13]    | 2013             | No Restriction           | PCOS 2123;<br>Control 3612                                                               | Case-control                      | No             | NOS- Good quality                                                                 |
| Shen et al.[14]    | 2013             | No Restriction           | PCOS 521;<br>Control 515                                                                 | Case-control                      | No             | STROBE- Moderate to high quality                                                  |
| Shen et al.[15]    | 2014             | No Restriction           | PCOS 1571;<br>Control 1918                                                               | Case-control                      | No             | NOS- Poor to good Quality                                                         |
| Shen et al.[16]    | 2014             | No Restriction           | PCOS 2458;<br>Control 5109                                                               | Clinical cohort and case-control  | No             | NOS- Poor to good quality                                                         |
| Shi et al.[17]     | 2016             | English or Chinese       | PCOS 2975;<br>Control 3011                                                               | Case-control                      | No             | NOS- Low to high Quality                                                          |
| Wang et al.[18]    | 2015             | English or Chinese       | PCOS 351;<br>Control 464                                                                 | Case-control                      | No             | 10 point scoring system- Fair quality                                             |



|                         |     |         |     |         |     |     |         |         |         |    |     |     |     |     |     |     |          |
|-------------------------|-----|---------|-----|---------|-----|-----|---------|---------|---------|----|-----|-----|-----|-----|-----|-----|----------|
| Gao et al 2016 [3]      | Yes | Partial | Yes | Partial | Yes | Yes | Partial | Partial | Yes     | No | Yes | Yes | Yes | Yes | Yes | Yes | High     |
| Guo et al 2015 [4]      | Yes | Partial | Yes | Yes     | Yes | Yes | Partial | Partial | Yes     | No | Yes | Yes | Yes | Yes | Yes | Yes | High     |
| Jia et al 2012 [5]      | Yes | Partial | Yes | No      | UA  | Yes | Partial | Partial | Yes     | No | Yes | Yes | Yes | Yes | Yes | Yes | Low      |
| Li et al. 2012 [6]      | Yes | Partial | Yes | Yes     | Yes | Yes | Partial | Partial | No      | No | Yes | Yes | Yes | Yes | Yes | No  | Low      |
| Liao et al 2018 [7]     | Yes | Partial | Yes | Yes     | Yes | Yes | Partial | Yes     | Yes     | No | Yes | Yes | Yes | Yes | Yes | Yes | Moderate |
| Liu et al. 2018 [8]     | Yes | Partial | Yes | Yes     | UA  | Yes | Partial | Partial | Yes     | No | Yes | Yes | Yes | Yes | Yes | Yes | Moderate |
| Pabalan et al. 2016 [9] | Yes | Partial | Yes | Yes     | UA  | Yes | Partial | Partial | Yes     | No | Yes | Yes | Yes | Yes | No  | Yes | Moderate |
| Qiu et al. 2015 [10]    | Yes | Partial | Yes | Yes     | UA  | Yes | Yes     | Yes     | Yes     | No | Yes | Yes | Yes | Yes | Yes | No  | Moderate |
| Ramos et al 2015 [11]   | Yes | Yes     | Yes | Yes     | Yes | Yes | Yes     | Partial | Yes     | No | Yes | Yes | Yes | Yes | Yes | Yes | Moderate |
| Ruan et al 2012 [12]    | Yes | Partial | Yes | Yes     | UA  | Yes | No      | Partial | No      | No | Yes | Yes | Yes | Yes | Yes | Yes | Low      |
| Shen et al 2013 [13]    | Yes | Partial | Yes | Yes     | Yes | Yes | Partial | Yes     | Yes     | No | Yes | Yes | Yes | Yes | Yes | Yes | High     |
| Shen et al 2013 [14]    | Yes | Yes     | Yes | Yes     | UA  | Yes | Partial | Partial | Yes     | No | Yes | Yes | Yes | Yes | Yes | Yes | Moderate |
| Shen et al 2014 [15]    | Yes | Partial | Yes | Yes     | Yes | Yes | Partial | Yes     | Yes     | No | Yes | Yes | Yes | Yes | Yes | Yes | High     |
| Shen et al 2014 [16]    | Yes | Partial | Yes | Yes     | UA  | Yes | Partial | Partial | Yes     | No | Yes | Yes | Yes | Yes | Yes | Yes | Moderate |
| Shi et al. 2016 [17]    | Yes | Yes     | Yes | Yes     | UA  | Yes | Partial | Partial | Yes     | No | Yes | No  | Yes | Yes | Yes | Yes | Moderate |
| Wang et al. 2015 [18]   | Yes | Partial | Yes | Yes     | UA  | Yes | Partial | Partial | Yes     | No | Yes | Yes | Yes | Yes | Yes | Yes | Moderate |
| Wu et al 2015 [19]      | Yes | Partial | Yes | Yes     | Yes | Yes | Partial | Partial | Yes     | No | Yes | Yes | Yes | Yes | Yes | Yes | High     |
| Yan et al. 2014 [20]    | Yes | Yes     | Yes | Yes     | Yes | Yes | Partial | Yes     | Yes     | No | Yes | Yes | Yes | Yes | Yes | No  | Moderate |
| Zhang et al 2013 [21]   | Yes | Yes     | Yes | No      | Yes | Yes | Yes     | Yes     | Partial | No | Yes | No  | Yes | No  | Yes | Yes | Low      |

AMSTAR, Assessing the Methodological Quality of Systematic Reviews; SR, Systematic Review; ROB, Risk of Bias; UA, Unable to determine

**Supplementary table 6. PCOS specific candidate gene systematic reviews methodology.**

| <b>Author</b>                                     | <b>What PCOS diagnostic criteria did the SR accept?</b>                               | <b>Did the SR Note the source of participants for their included studies?</b>    | <b>Did the SR have clearly defined control inclusion criteria?</b>                                                               | <b>Were controls Not in HWE included in meta-analysis? Was sensitivity analysis performed?</b> |
|---------------------------------------------------|---------------------------------------------------------------------------------------|----------------------------------------------------------------------------------|----------------------------------------------------------------------------------------------------------------------------------|------------------------------------------------------------------------------------------------|
| <b>Metabolic dysfunction</b>                      |                                                                                       |                                                                                  |                                                                                                                                  |                                                                                                |
| Feng et al.[2]                                    | Primary studies where diagnostic criteria was Not defined<br>Rotterdam<br>NIH<br>JSOG | Not described                                                                    | Not described                                                                                                                    | Yes HWE was tested.<br>No Sensitivity analysis was performed                                   |
| Gao et al. [3]                                    | Rotterdam<br>NIH<br>Self-report                                                       | Not described                                                                    | Not described                                                                                                                    | Yes HWE was tested.<br>Sensitivity analysis was performed                                      |
| Jia et al.[5]                                     | Rotterdam<br>NIH                                                                      | Not described                                                                    | Healthy women without PCOS                                                                                                       | Yes HWE was tested.<br>Sensitivity analysis was conducted.                                     |
| Liao et al.[7]                                    | Rotterdam<br>NIH                                                                      | Source of controls: Hospital-based and population-based.                         | Not described                                                                                                                    | Yes HWE was tested.<br>Sensitivity analysis was conducted.                                     |
| Liu et al. [8]                                    | Not described                                                                         | Not described                                                                    | Not described                                                                                                                    | Yes HWE was tested.<br>Sensitivity analysis was conducted                                      |
| Ramos et al.[11]                                  | Not described however all primary studies fulfilled Rotterdam criteria                | Not described                                                                    | Healthy women                                                                                                                    | No primary studies were excluded if the control group deviated from HWE.                       |
| Ruan et al.[12]                                   | Not described                                                                         | Not described                                                                    | Unrelated healthy women                                                                                                          | Yes HWE was tested.<br>Sensitivity analysis was conducted.                                     |
| Shen et al.[13]                                   | Rotterdam<br>NIH                                                                      | Source of controls: Hospital-based and population-based.                         | Healthy women with Normal menstrual cycles, ovarian morphology, and without history of subfertility treatment                    | No primary studies were excluded if the control group deviated from HWE.                       |
| Shen et al.[14]                                   | Not described                                                                         | Matched recruitment of cases and controls (Hospital-based and population-based). | Healthy women                                                                                                                    | No primary studies were excluded if the control group deviated from HWE.                       |
| Shen et al.[15]                                   | Rotterdam<br>NIH                                                                      | Source of controls: Hospital-based and population-based.                         | Healthy women with Normal menstrual cycles, ovarian morphology, and without history of subfertility treatment                    | No primary studies were excluded if the control group deviated from HWE.                       |
| Shen et al.[16]                                   | Rotterdam<br>NIH                                                                      | Not described                                                                    | Not described                                                                                                                    | No primary studies were excluded if the control group deviated from HWE.                       |
| Shi et al.[17]                                    | Not described                                                                         | Not described                                                                    | No criteria however stated they included women who were infertile or had other gynaecological conditions in their control group. | Yes HWE was tested.<br>Sensitivity analysis was conducted.                                     |
| Yan et al.[20]                                    | Not described                                                                         | Source of controls- Hospital and population based.                               | Not described                                                                                                                    | Yes HWE was tested.<br>Sensitivity analysis was conducted.                                     |
| <b>Imbalances in Androgens and Gonadotrophins</b> |                                                                                       |                                                                                  |                                                                                                                                  |                                                                                                |
| Li et al.[6]                                      | Not described                                                                         | Not described                                                                    | Not described                                                                                                                    | Yes HWE was tested.<br>Sensitivity analysis was conducted.                                     |

|                     |                                                                                                                                                                                                                                     |                                                    |                                          |                                                            |
|---------------------|-------------------------------------------------------------------------------------------------------------------------------------------------------------------------------------------------------------------------------------|----------------------------------------------------|------------------------------------------|------------------------------------------------------------|
| Pabalan et al. [9]  | Not described                                                                                                                                                                                                                       | Not described                                      | Not described                            | All control groups were in HWE.                            |
| Qiu et al. [10]     | Rotterdam<br>Only specific phenotypes accepted [Hyperandrogenism + irregular cycles + oligo or anovulation; Hyperandrogenism + Polycystic Ovaries + irregular cycles; Polycystic ovaries + oligo or anovulation + irregular cycles] | Not described                                      | Age and ethnicity matched healthy women  | All control groups were in HWE.                            |
| Zhang et al. [21]   | Rotterdam<br>NIH<br>Androgen Excess & PCOS Society                                                                                                                                                                                  | Source of controls- Hospital and population based. | Healthy women with proven fertility      | Not tested                                                 |
| <b>Inflammation</b> |                                                                                                                                                                                                                                     |                                                    |                                          |                                                            |
| Chen et al. [1]     | Not described                                                                                                                                                                                                                       | Not described                                      | Healthy women                            | Yes HWE was tested.<br>Sensitivity analysis was conducted. |
| Guo et al. [4]      | Rotterdam<br>NIH                                                                                                                                                                                                                    | Not described                                      | Healthy women                            | Yes HWE was tested.<br>Sensitivity analysis was conducted. |
| Wang et al. [18]    | Not described                                                                                                                                                                                                                       | Not described                                      | Alive and free from diagnosed PCOS women | Yes HWE was tested.<br>Sensitivity analysis was conducted. |
| Wu et al. [19]      | Rotterdam<br>NIH                                                                                                                                                                                                                    | Not described                                      | Healthy women                            | Yes HWE was tested.<br>Sensitivity analysis was conducted. |

HWE, Hardy-Weinberg Equilibrium; JSOG, Japanese Society of Obstetrics and Gynaecology; NIH, National Institute of Health; PCOS, Polycystic Ovary Syndrome; SR, Systematic Review.

#### References

1. Chen, L., et al., *Association between rs1800795 polymorphism in the interleukin-6 gene and the risk of polycystic ovary syndrome: A meta-analysis*. *Medicine (Baltimore)*, 2018. **97**(29): p. e11558.
2. Feng, C., et al., *The association between polymorphism of INSR and polycystic ovary syndrome: a meta-analysis*. *Int. J. Mol. Sci.*, 2015. **16**(2): p. 2403-25.
3. Gao, J., et al., *The association of DENND1A gene polymorphisms and polycystic ovary syndrome risk: a systematic review and meta-analysis*. *Arch Gynecol Obstet*, 2016. **294**(5): p. 1073-1080.
4. Guo, R., et al., *Association of TNF-alpha, IL-6 and IL-1beta gene polymorphisms with polycystic ovary syndrome: a meta-analysis*. *BMC Genet*, 2015. **16**: p. 5.
5. Jia, H., et al., *Associations of adiponectin gene polymorphisms with polycystic ovary syndrome: a meta-analysis*. *Endocrine*, 2012. **42**(2): p. 299-306.
6. Li, Y., et al., *Polymorphism T->C of gene CYP17 promoter and polycystic ovary syndrome risk: a meta-analysis*. *Gene*, 2012. **495**(1): p. 16-22.
7. Liao, D., et al., *Association of PON1 gene polymorphisms with polycystic ovarian syndrome risk: a meta-analysis of case-control studies*. *J Endocrinol Invest*, 2018. **41**(11): p. 1289-1300.
8. Liu, Z., et al., *Effects of ADIPOQ polymorphisms on PCOS risk: a meta-analysis*. *Reprod Biol Endocrinol*, 2018. **16**(1): p. 120.
9. Pabalan, N., et al., *Associations of Polymorphisms in Anti-Mullerian Hormone (AMH Ile49Ser) and its Type II Receptor (AMHRII -482 A>G) on Reproductive Outcomes and Polycystic Ovary Syndrome: a Systematic Review and Meta-Analysis*. *Cell Physiol Biochem*, 2016. **39**(6): p. 2249-2261.
10. Qiu, L., J. Liu, and Q.M. Hei, *Association between two polymorphisms of follicle stimulating hormone receptor gene and susceptibility to polycystic ovary syndrome: a meta-analysis*. *Chin Med Sci J*, 2015. **30**(1): p. 44-50.
11. Ramos, R.B., et al., *Association between rs7903146 and rs12255372 polymorphisms of transcription factor 7-like 2 gene and polycystic ovary syndrome: a systematic review and meta-analysis*. *Endocrine*, 2015. **49**(3): p. 635-42.
12. Ruan, Y., J. Ma, and X. Xie, *Association of IRS-1 and IRS-2 genes polymorphisms with polycystic ovary syndrome: a meta-analysis*. *Endocr J*, 2012. **59**(7): p. 601-9.
13. Shen, W., et al., *Calpain-10 genetic polymorphisms and polycystic ovary syndrome risk: a meta-analysis and meta-regression*. *Gene*, 2013. **531**(2): p. 426-34.

14. Shen, W., et al., *CYP1A1 gene polymorphisms and polycystic ovary syndrome risk: a meta-analysis and meta-regression. Genet Test Mol Biomarkers*, 2013. **17**(10): p. 727-35.
15. Shen, W., et al., *Common polymorphisms in the CYP1A1 and CYP11A1 genes and polycystic ovary syndrome risk: a meta-analysis and meta-regression. Arch Gynecol Obstet*, 2014. **289**(1): p. 107-18.
16. Shen, W.J., et al., *Relationships between TCF7L2 genetic polymorphisms and polycystic ovary syndrome risk: a meta-analysis. Metab Syndr Relat Disord*, 2014. **12**(4): p. 210-9.
17. Shi, X., et al., *Associations of insulin receptor and insulin receptor substrates genetic polymorphisms with polycystic ovary syndrome: A systematic review and meta-analysis. J Obstet Gynaecol Res*, 2016. **42**(7): p. 844-54.
18. Wang, Q., et al., *Meta-analysis of the correlation between IL-6 -174 G/C polymorphism and polycystic ovarian syndrome. J Obstet Gynaecol Res*, 2015. **41**(7): p. 1087-92.
19. Wu, H., K. Yu, and Z. Yang, *Associations between TNF-alpha and interleukin gene polymorphisms with polycystic ovary syndrome risk: a systematic review and meta-analysis. J Assist Reprod Genet*, 2015. **32**(4): p. 625-34.
20. Yan, M.S., et al., *Association of insulin gene variable number of tandem repeats regulatory polymorphism with polycystic ovary syndrome. Hum Immunol*, 2014. **75**(10): p. 1047-52.
21. Zhang, T., et al., *Association of the CAG repeat polymorphisms in androgen receptor gene with polycystic ovary syndrome: a systemic review and meta-analysis. Gene*, 2013. **524**(2): p. 161-7.
22. Shea, B.J., et al., *AMSTAR 2: a critical appraisal tool for systematic reviews that include randomised or Non-randomised studies of healthcare interventions, or both. BMJ*, 2017. **358**: p. j4008.

**Supplementary Table 7: PRISMA Checklist**

| Section/topic             | # | Checklist item                                                                                                                                                                                                                                                                                              | Reported on page #            |
|---------------------------|---|-------------------------------------------------------------------------------------------------------------------------------------------------------------------------------------------------------------------------------------------------------------------------------------------------------------|-------------------------------|
| <b>TITLE</b>              |   |                                                                                                                                                                                                                                                                                                             |                               |
| Title                     | 1 | Identify the report as a systematic review, meta-analysis, or both.                                                                                                                                                                                                                                         | 1                             |
| <b>ABSTRACT</b>           |   |                                                                                                                                                                                                                                                                                                             |                               |
| Structured summary        | 2 | Provide a structured summary including, as applicable: background; objectives; data sources; study eligibility criteria, participants, and interventions; study appraisal and synthesis methods; results; limitations; conclusions and implications of key findings; systematic review registration number. | 2                             |
| <b>INTRODUCTION</b>       |   |                                                                                                                                                                                                                                                                                                             |                               |
| Rationale                 | 3 | Describe the rationale for the review in the context of what is already known.                                                                                                                                                                                                                              | 3-5                           |
| Objectives                | 4 | Provide an explicit statement of questions being addressed with reference to participants, interventions, comparisons, outcomes, and study design (PICOS).                                                                                                                                                  | 5-6 and supplementary table 1 |
| <b>METHODS</b>            |   |                                                                                                                                                                                                                                                                                                             |                               |
| Protocol and registration | 5 | Indicate if a review protocol exists, if and where it can be accessed (e.g., Web address), and, if available, provide registration information including registration number.                                                                                                                               | 2 and 5                       |

|                                    |    |                                                                                                                                                                                                                        |                         |
|------------------------------------|----|------------------------------------------------------------------------------------------------------------------------------------------------------------------------------------------------------------------------|-------------------------|
| Eligibility criteria               | 6  | Specify study characteristics (e.g., PICOS, length of follow-up) and report characteristics (e.g., years considered, language, publication status) used as criteria for eligibility, giving rationale.                 | 5-7                     |
| Information sources                | 7  | Describe all information sources (e.g., databases with dates of coverage, contact with study authors to identify additional studies) in the search and date last searched.                                             | 5                       |
| Search                             | 8  | Present full electronic search strategy for at least one database, including any limits used, such that it could be repeated.                                                                                          | Supplementary table two |
| Study selection                    | 9  | State the process for selecting studies (i.e., screening, eligibility, included in systematic review, and, if applicable, included in the meta-analysis).                                                              | 5-7                     |
| Data collection process            | 10 | Describe method of data extraction from reports (e.g., piloted forms, independently, in duplicate) and any processes for obtaining and confirming data from investigators.                                             | 5-7                     |
| Data items                         | 11 | List and define all variables for which data were sought (e.g., PICOS, funding sources) and any assumptions and simplifications made.                                                                                  | 5-7                     |
| Risk of bias in individual studies | 12 | Describe methods used for assessing risk of bias of individual studies (including specification of whether this was done at the study or outcome level), and how this information is to be used in any data synthesis. | 6                       |
| Summary measures                   | 13 | State the principal summary measures (e.g., risk ratio, difference in means).                                                                                                                                          | 6                       |
| Synthesis of results               | 14 | Describe the methods of handling data and combining results of studies, if done, including measures of consistency (e.g., I <sup>2</sup> ) for each meta-analysis.                                                     | N/A                     |

| Section/topic                 | #  | Checklist item                                                                                                                                                                                           | Reported on page # |
|-------------------------------|----|----------------------------------------------------------------------------------------------------------------------------------------------------------------------------------------------------------|--------------------|
| Risk of bias across studies   | 15 | Specify any assessment of risk of bias that may affect the cumulative evidence (e.g., publication bias, selective reporting within studies).                                                             | Supp table 4       |
| Additional analyses           | 16 | Describe methods of additional analyses (e.g., sensitivity or subgroup analyses, meta-regression), if done, indicating which were pre-specified.                                                         | N/A                |
| <b>RESULTS</b>                |    |                                                                                                                                                                                                          |                    |
| Study selection               | 17 | Give numbers of studies screened, assessed for eligibility, and included in the review, with reasons for exclusions at each stage, ideally with a flow diagram.                                          | Figure 1           |
| Study characteristics         | 18 | For each study, present characteristics for which data were extracted (e.g., study size, PICOS, follow-up period) and provide the citations.                                                             | Sup table 3 and 5  |
| Risk of bias within studies   | 19 | Present data on risk of bias of each study and, if available, any outcome level assessment (see item 12).                                                                                                | Supp table 4       |
| Results of individual studies | 20 | For all outcomes considered (benefits or harms), present, for each study: (a) simple summary data for each intervention group (b) effect estimates and confidence intervals, ideally with a forest plot. | Figure 3,4,5,      |

|                             |    |                                                                                                                                                                                      |                                                   |
|-----------------------------|----|--------------------------------------------------------------------------------------------------------------------------------------------------------------------------------------|---------------------------------------------------|
|                             |    |                                                                                                                                                                                      | tables 1 & 2, Sup table 3                         |
| Synthesis of results        | 21 | Present results of each meta-analysis done, including confidence intervals and measures of consistency.                                                                              | N/A                                               |
| Risk of bias across studies | 22 | Present results of any assessment of risk of bias across studies (see Item 15).                                                                                                      | N/A                                               |
| Additional analysis         | 23 | Give results of additional analyses, if done (e.g., sensitivity or subgroup analyses, meta-regression [see Item 16]).                                                                | N/A                                               |
| <b>DISCUSSION</b>           |    |                                                                                                                                                                                      |                                                   |
| Summary of evidence         | 24 | Summarize the main findings including the strength of evidence for each main outcome; consider their relevance to key groups (e.g., healthcare providers, users, and policy makers). | Pg 9-14. Figure 3,4,5, tables 1 & 2, Sup table 3. |
| Limitations                 | 25 | Discuss limitations at study and outcome level (e.g., risk of bias), and at review-level (e.g., incomplete retrieval of identified research, reporting bias).                        | 15 and sub table 4                                |
| Conclusions                 | 26 | Provide a general interpretation of the results in the context of other evidence, and implications for future research.                                                              | 16-21                                             |
| <b>FUNDING</b>              |    |                                                                                                                                                                                      |                                                   |
| Funding                     | 27 | Describe sources of funding for the systematic review and other support (e.g., supply of data); role of funders for the systematic review.                                           | 2                                                 |

From: Moher D, Liberati A, Tetzlaff J, Altman DG, The PRISMA Group (2009). Preferred Reporting Items for Systematic Reviews and Meta-Analyses: The PRISMA Statement. PLoS Med 6(6): e1000097. doi:10.1371/journal.pmed1000097

For more information, visit: [www.prisma-statement.org](http://www.prisma-statement.org).
